# Supplementary material for: Hyaluronic Acid Decorated Naringenin Nanoparticles: Appraisal of Chemopreventive and Curative Potential for Lung Cancer
Source: MDPI journal article supplement (doi:10.3390/pharmaceutics10010033), 2018-03-12
Supplement: s1 [file s1]

# Hyaluronic Acid Decorated Naringenin Nanoparticles: Appraisal of Chemopreventive and Curative Potential for Lung Cancer

Poonam Parashar, Meena Rathor, Monika Dwivedi, Shubhini A Saraf\*

**Table S1.** Factors and their levels with codes for PCL formulations.

| Variables                      | Levels   |           |
|--------------------------------|----------|-----------|
|                                | Low (-1) | High (+1) |
| A (amount of PCL in %w/v)      | 0.5      | 1         |
| B (amount of Tween 80 in %w/v) | 0.5      | 1         |
| C (Stirring speed in rpm)      | 600      | 800       |

**Table S2.** 2<sup>3</sup> full factorial design layouts for optimization of PCL formulations.

| Formulation code | Factor 1 | Factor 2 | Factor 3 |
|------------------|----------|----------|----------|
| F1               | +1       | +1       | -1       |
| F2               | +1       | -1       | -1       |
| F3               | -1       | +1       | +1       |
| F4               | +1       | +1       | +1       |
| F5               | -1       | -1       | +1       |
| F6               | +1       | -1       | +1       |
| F7               | -1       | +1       | -1       |
| F8               | -1       | -1       | -1       |
